# Supplementary material
Source: MDPI journal article supplement (https://www.mdpi.com/1999-4907/7/10/237)
Supplement: s1 [file s1]

Beyond Fuel Treatment Effectiveness: Characterizing Interactions between Fire and Treatments in the US

Kevin Barnett, Sean A. Parks, Carol Miller, and Helen T. Naughton

**Table S1.** Summary statistics of wildland fires, fuel treatments, and their interactions across ecoregions of the CONUS.

| **Ecoregion description** | | | **Fire statistics** | | **Fuel treatment statistics** | | **Fuel treatment-fire interaction statistics** | | |
| --- | --- | --- | --- | --- | --- | --- | --- | --- | --- |
| **Ecoregion** | **States** | **Area (square.miles)** | **Number of MTBS fires** | **Total area burned (ha)** | **Number of Rx units** | **Total Rx area (ha)** | **Number of fuel treatment-fire interactions** | **Total treated area burned (ha)** | **Encounter rate** |
| Allegheny Plateau | OH, PA, WV | 36,039 | 0 | 0 | 0 | 0 | 0 | 0 | NA |
| Appalachia | KY, OH, TN, VA, WV | 30,636 | 31 | 16,544 | 30 | 3030 | 0 | 0 | 0.00 |
| Appalachia Bluegrass Hills | IL, IN, KY, MO, OH, TN | 56,603 | 5 | 2630 | 25 | 3897 | 0 | 0 | 0.00 |
| Blue Mountain Region of the Columbia Plateau | NV, OR, WA, ID, CA | 56,521 | 246 | 1,767,945 | 11864 | 252,501 | 685 | 10,863 | 0.06 |
| California Central Valley | CA | 21,758 | 15 | 42,989 | 17 | 192 | 0 | 0 | 0.00 |
| Cascade Mountain Range | CA, OR, NV | 36,273 | 102 | 394,808 | 19684 | 303,731 | 566 | 6940 | 0.03 |
| Central Great Lakes Uplands | IL, IA, MI, MN, WI | 54,569 | 2 | 683 | 501 | 6116 | 0 | 0 | 0.00 |
| Central Till Plains | IL, IN, IA, KY, MI, MO, WI | 63,717 | 1 | 349 | 37 | 922 | 0 | 0 | 0.00 |
| Chesapeake Bay | DE, DC, MD, NJ, NY, NC, PA, VA | 42,995 | 9 | 13,630 | 51 | 2353 | 5 | 256 | 0.10 |
| Chihuahuan Desert | NM, TX | 58,697 | 54 | 344,029 | 200 | 37,645 | 26 | 2157 | 0.13 |
| Coastal Gulf Plains | AL, FL, LA, MS | 41,209 | 24 | 19,597 | 144 | 11,315 | 1 | 2 | 0.01 |
| Colorado Plateau | UT, CO, AZ, WY | 47,563 | 81 | 170,226 | 2556 | 60,708 | 69 | 1496 | 0.03 |
| Connecticut River Basin and Highlands | CT, MA, NH, NJ, RI, VT | 32,173 | 2 | 740 | 6 | 58 | 0 | 0 | 0.00 |
| Cumberland Highlands | AL, GA, TN | 30,630 | 14 | 7085 | 7 | 1304 | 0 | 0 | 0.00 |
| Death Valley Basin | CA, NV, UT, AZ | 54,803 | 72 | 396,898 | 20 | 197 | 0 | 0 | 0.00 |
| Eastern Coastal Plain | GA, NC, SC | 43,890 | 23 | 51,100 | 399 | 22,684 | 12 | 852 | 0.03 |
| Eastern Great Basin | ID, NV, UT | 46,910 | 214 | 991,028 | 478 | 33,572 | 21 | 588 | 0.04 |
| Eastern Great Plains | IA, KS, MO, NB, OK, SD | 73,609 | 8 | 18,225 | 17 | 4146 | 1 | 320 | 0.06 |
| Eastern Till Plains | IN, MI, OH | 33,581 | 0 | 0 | 0 | 0 | 0 | 0 | NA |
| Edwards Plateau | TX | 61,986 | 11 | 11,776 | 0 | 0 | 0 | 0 | NA |
| Finger Lakes | NY, PA | 34,501 | 0 | 0 | 93 | 735 | 0 | 0 | 0.00 |
| Floridian Coastal Plain | FL | 35,738 | 44 | 70,244 | 15700 | 229,163 | 1133 | 26,621 | 0.07 |
| Grande Coulee Basin of the Columbia Plateau | WA, OR, ID | 29,672 | 101 | 450,958 | 18 | 151 | 0 | 0 | 0.00 |
| Great Lakes Plains | IN, MI, OH, WI | 94,488 | 9 | 9,644 | 2092 | 26,975 | 2 | 8 | 0.00 |
| Great Plains Tablelands | CO, NM, OK, TX | 52,755 | 38 | 130,957 | 102 | 5621 | 0 | 0 | 0.00 |
| Gulf Plains | AL, GA, MS, TN | 49,731 | 9 | 5234 | 53 | 7462 | 0 | 0 | 0.00 |
| Middle Rocky Mountains | ID, MT, WY | 28,983 | 109 | 376,807 | 1724 | 35,928 | 14 | 525 | 0.01 |
| Mississippi Alluvial Plains | AR, IL, KY, LA, MS, MO, TN | 31,986 | 1 | 293 | 123 | 888 | 0 | 0 | 0.00 |
| Mississippi Delta | LA, MS | 20,900 | 1 | 528 | 0 | 0 | 0 | 0 | NA |
| Missouri River Plateau | MT | 51,769 | 48 | 319,247 | 218 | 9468 | 1 | 1216 | 0.00 |
| Mogollon Rim | NV, AZ, NM | 41,772 | 194 | 1,206,605 | 2331 | 154,441 | 720 | 21,578 | 0.31 |
| Navajo Plateau | AZ, NM, UT, CO | 51,678 | 12 | 34,134 | 612 | 37,892 | 9 | 462 | 0.01 |
| Northeastern Highlands | NJ, NY, PA, VT | 31,128 | 1 | 208 | 4 | 36 | 0 | 0 | 0.00 |
| Northeastern Piedmont | NC, SC, VA | 29,647 | 0 | 0 | 5 | 62 | 0 | 0 | 0.00 |
| Northern Appalachia | MD, PA, VA, WV | 42,950 | 30 | 31,440 | 8 | 844 | 0 | 0 | 0.00 |
| Northern California Coastal Range | CA, OR | 22,017 | 102 | 479,765 | 4225 | 30,182 | 234 | 1556 | 0.06 |
| Northern Cascades | WA | 38,582 | 56 | 292,119 | 3026 | 34,683 | 69 | 336 | 0.02 |
| Northern Great Plains | MN, ND | 49,627 | 12 | 10,165 | 709 | 22,995 | 69 | 524 | 0.10 |
| Northern Lake Country | MI, MN, WS | 67,110 | 14 | 55,228 | 1952 | 37,079 | 34 | 253 | 0.02 |
| Northern Rocky Mountains | ID, MT | 41,826 | 127 | 598,133 | 5816 | 96,634 | 151 | 2118 | 0.03 |
| Northwestern Great Plains | MT, ND, SD | 54,498 | 32 | 49,106 | 81 | 3228 | 0 | 0 | 0.00 |
| Northwestern Rocky Mountains | ID, MT, WA | 55,755 | 275 | 2,010,389 | 13664 | 198,225 | 588 | 11,495 | 0.04 |
| Oregon Coastal Range | OR | 19,272 | 12 | 248,809 | 4969 | 46,301 | 376 | 2300 | 0.08 |
| Ouachita Hills | AR, LA, OK, TX | 66,863 | 75 | 103,109 | 1630 | 101,607 | 143 | 24,467 | 0.09 |
| Ozark Highlands | AR, IL, KS, MO, OK, TX | 78,784 | 67 | 74,327 | 6568 | 119,581 | 747 | 5129 | 0.11 |
| Prairie Coteau Lands | IA, MN, NB, ND, SD | 61,354 | 6 | 5852 | 495 | 13,124 | 0 | 0 | 0.00 |
| Rio Grande Basin | AZ, NM, TX | 42,492 | 103 | 496,174 | 616 | 44,208 | 55 | 3,442 | 0.09 |
| Sandhills | NB, SD, WY | 59,130 | 16 | 97,343 | 191 | 12,533 | 13 | 220 | 0.07 |
| Sierra Nevada Mountain Range | CA, NV | 31,844 | 189 | 701,378 | 14082 | 138,748 | 1182 | 9299 | 0.08 |
| Snake River Plain | OR, ID, NV, WY | 36,340 | 353 | 1,900,194 | 470 | 87,119 | 155 | 38,586 | 0.33 |
| Sonoran Desert | CA, AZ | 36,272 | 37 | 115,479 | 13 | 6534 | 0 | 0 | 0.00 |
| Southeastern Coastal Plain | AL, FL, GA, SC | 58,267 | 68 | 505,595 | 6252 | 163,438 | 1185 | 25,475 | 0.19 |
| Southeastern Great Plains | KS, OK, TX | 61,107 | 25 | 75,047 | 4 | 713 | 1 | 438 | 0.25 |
| Southern Appalachia | GA, NC, SC, TN, VA, WV | 21,787 | 22 | 15,087 | 436 | 4,859 | 0 | 0 | 0.00 |
| Southern California Coastal Range | CA | 37,534 | 160 | 1,011,199 | 974 | 13,468 | 334 | 4561 | 0.34 |
| Southern Great Plains | CO, KS, NM, OK | 68,161 | 10 | 153,581 | 36 | 6334 | 1 | 5 | 0.03 |
| Southern Piedmont | Al, GA, NC, SC | 31,561 | 5 | 1746 | 448 | 11,972 | 9 | 198 | 0.02 |
| Southern Rocky Mountains | NM, WY, CO | 53,311 | 76 | 455,544 | 3412 | 71,081 | 63 | 2847 | 0.02 |
| The North Woods | ME, NH, NY, VT | 46,834 | 1 | 486 | 198 | 1929 | 0 | 0 | 0.00 |
| Till Plains | IL, IA, KS, MO, OK | 54,629 | 3 | 922 | 82 | 1789 | 20 | 29 | 0.24 |
| Utah High Plateaus | UT, ID, WY | 24,057 | 82 | 310,892 | 964 | 59,100 | 15 | 745 | 0.02 |
| Western Great Basin | NV, CA | 72,390 | 241 | 1,241,940 | 392 | 74,282 | 7 | 1385 | 0.02 |
| Western Great Plains | CO, KS, NB, WY | 59,537 | 5 | 8180 | 4 | 1 | 0 | 0 | 0.00 |
| Western Gulf Plains | TX | 55,188 | 10 | 18,000 | 57 | 12,462 | 1 | 7 | 0.02 |
| Western Till Plains | IL, IA, KS, MN, MO, NB, WI | 50,668 | 0 | 0 | 150 | 2477 | 0 | 0 | 0.00 |
| Wyoming Basin | MT, WY, CO, ID, UT | 63,661 | 36 | 126,294 | 1878 | 75,937 | 6 | 4 | 0.00 |
| Wyoming Highlands | MT, NB, ND, SD, WY | 63,661 | 177 | 803,137 | 3570 | 58,194 | 526 | 6985 | 0.15 |


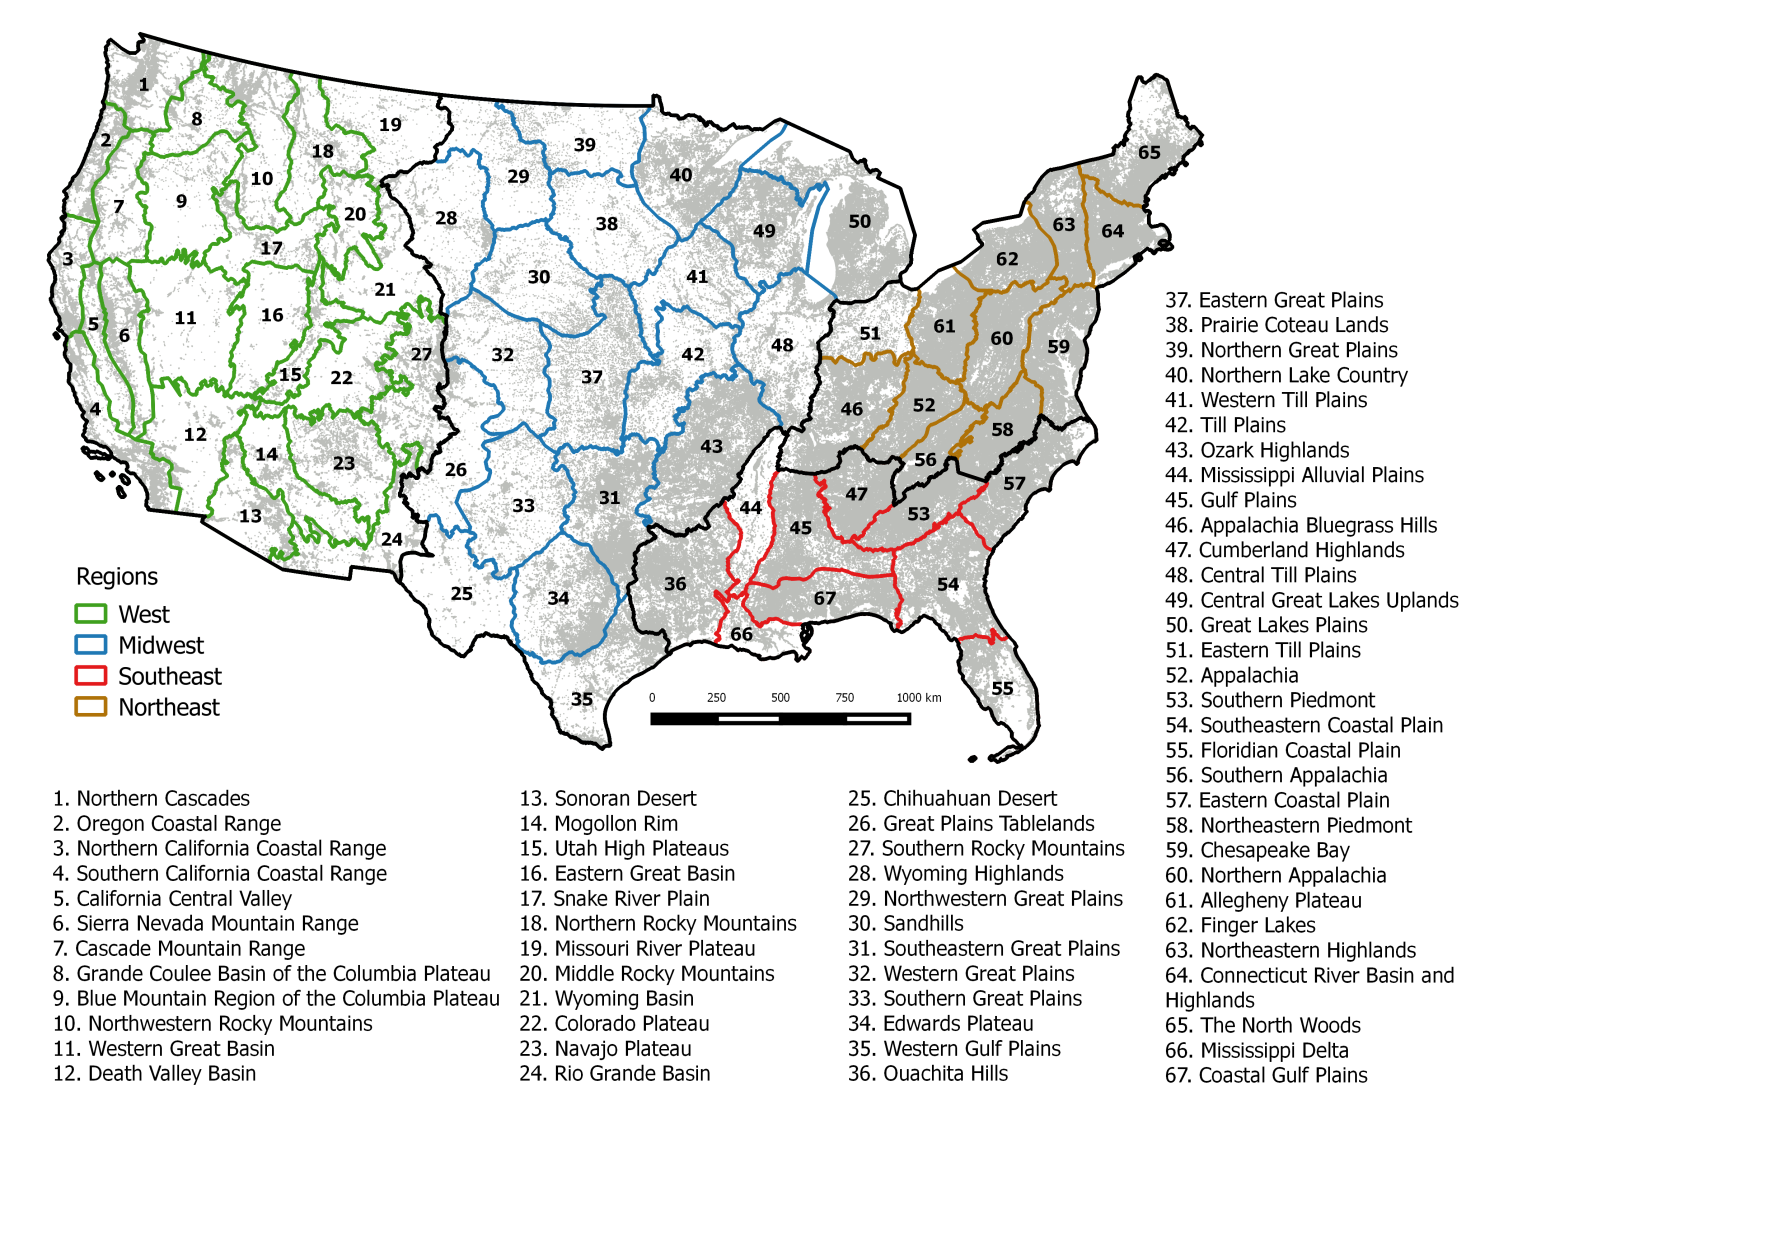


**Figure S1.** Distribution of WUI lands including 2.5 km buffer (gray) among regions and ecoregions of the CONUS.


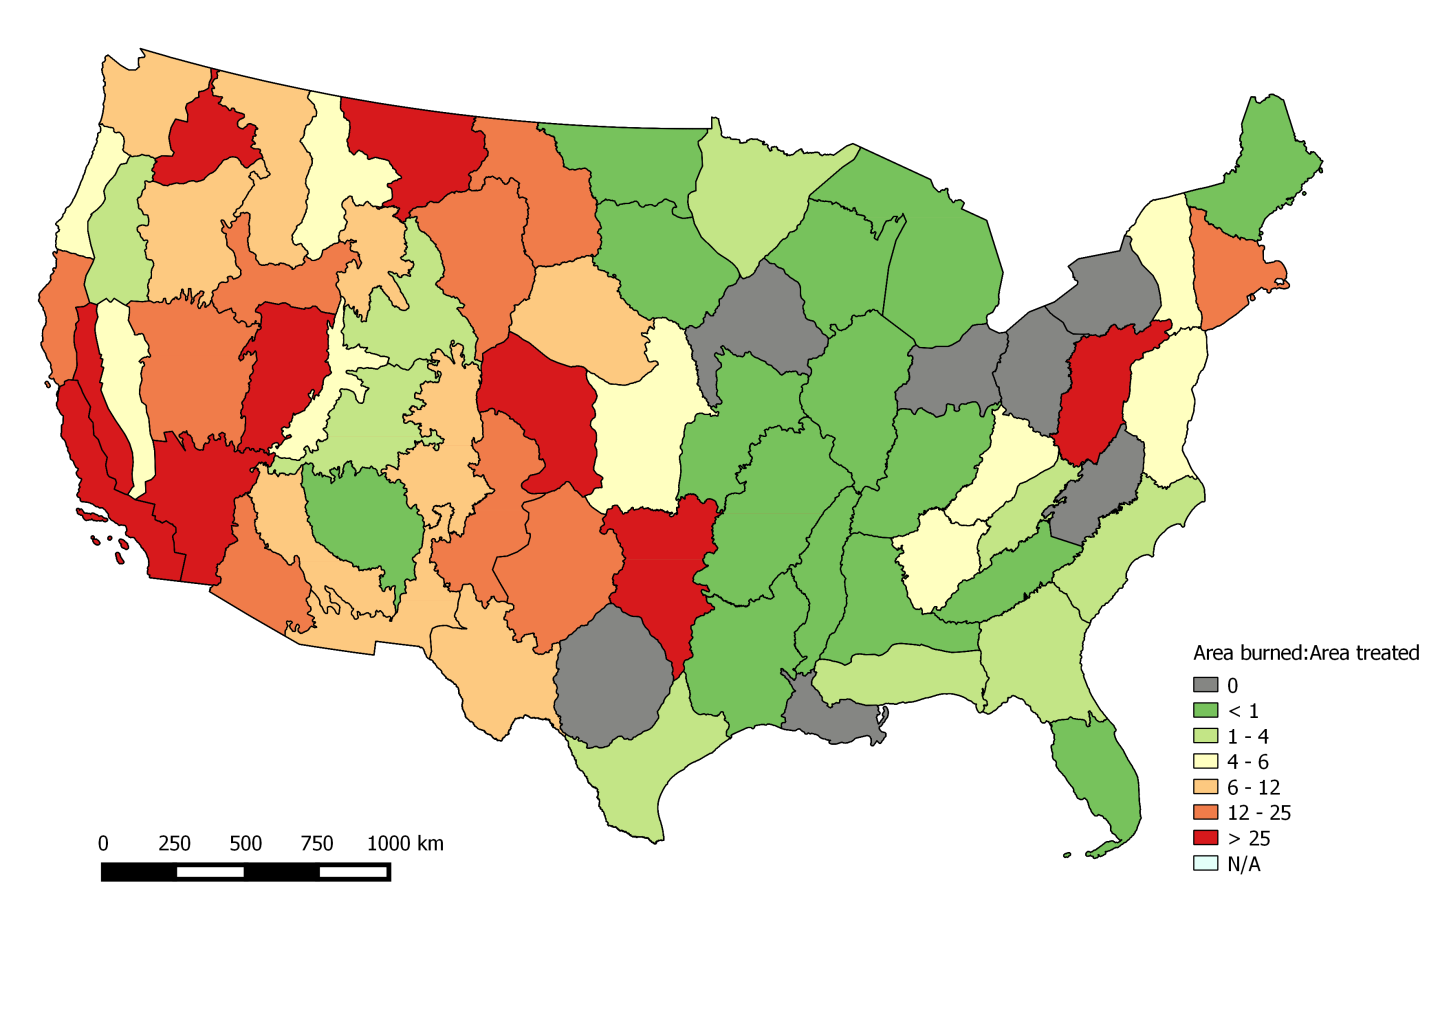


**Figure S2.** Map showing the ratio of area burned to area treated across ecoregions of the CONUS.
